# Supplementary material for: Polyvalent Bacterial Lysate Protects Against Pneumonia Independently of Neutrophils, IL-17A or Caspase-1 Activation
Source: PubMed Central journal article supplement (PMC8108696; doi:10.3389/fimmu.2021.562244), 2021-04-26
Supplement: Image_1.pdf [file Image_1.pdf]

### A) Isotype control

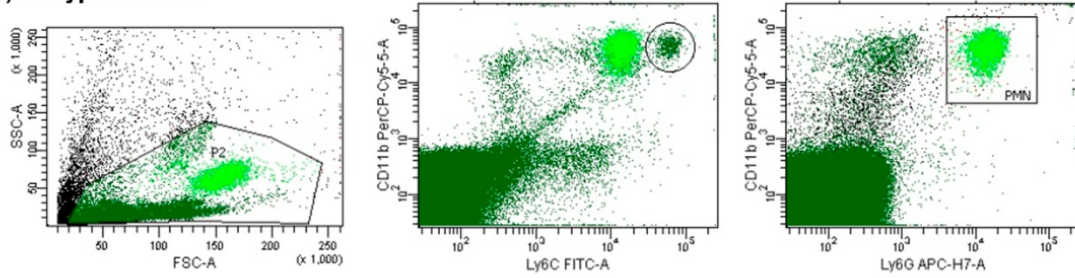

### B) Anti-Gr1

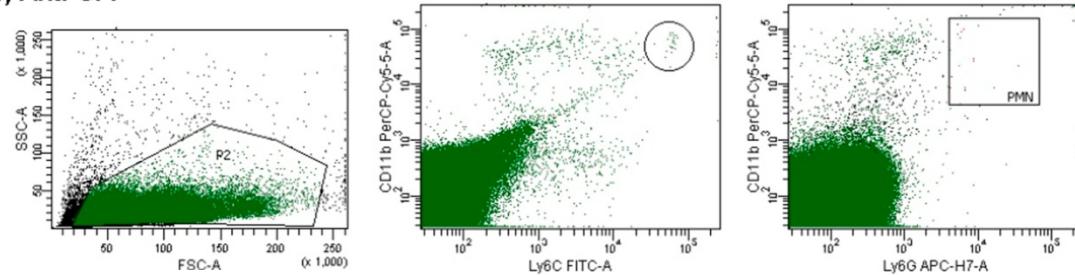

### C)

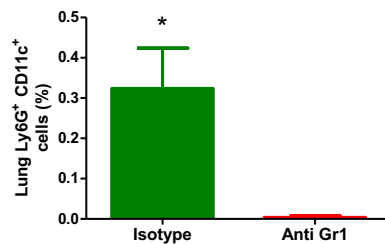

**Supplemental Figure 1.** Depletion of Gr1<sup>+</sup> cells. Mice (n=3) were i.p. treated with 100  $\mu$ g of isotype control antibody rat IgG2b, clone HB152 (A) or monoclonal anti-Gr1 antibody clone RB6-8C5, (B) and after 12 h were i.n. treated with PMBL (18  $\mu$ g/30  $\mu$ l). Peripheral blood was drawn (24 h after PMBL treatment) to assess the efficacy of PMNs depletion by flow cytometry using the following antibodies CD11b-PerCPCy5, Ly6C-FITC y Ly6G-APCCy7. The administration of RB6-8C5 antibodies induced almost absolute reduction in peripheral blood PMNs populations assessed both as CD11b<sup>+</sup>/Ly6C<sup>+</sup> (circle) and CD11b<sup>+</sup>/Ly6G<sup>+</sup> (square) 24 h after PMBL treatment, compared with those receiving the isotype control antibody. (C) Mean  $\pm$  SEM of lung Ly6G<sup>+</sup> CD11b<sup>+</sup> cells (shown as % from total lung viable cells).\*, p<0.05, Unpaired Man Whitney Test.
