# Supplementary material for: Polyvalent Bacterial Lysate Protects Against Pneumonia Independently of Neutrophils, IL-17A or Caspase-1 Activation
Source: PubMed Central journal article supplement (PMC8108696; doi:10.3389/fimmu.2021.562244), 2021-04-26
Supplement: Image_2.pdf [file Image_2.pdf]

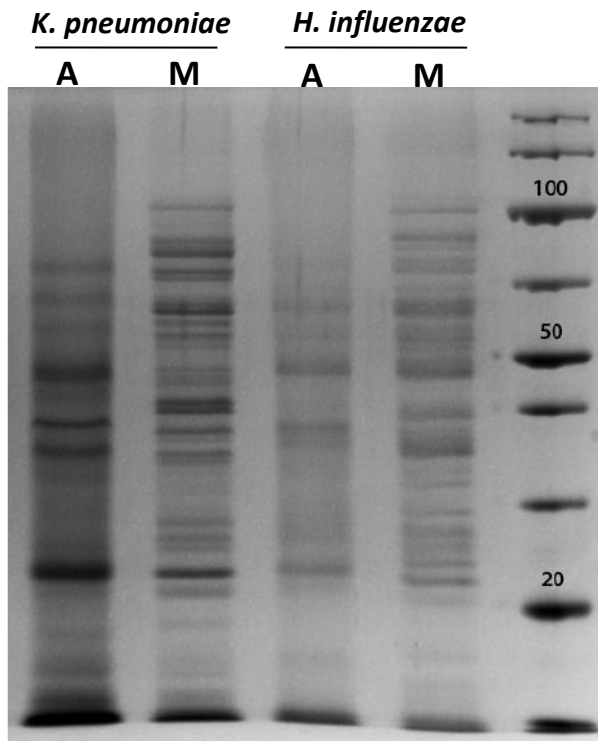

**Supplemental Figure 2.** SDS-PAGE protein profile for monovalent alkaline (A) and mechanical (M) lysate of *Klebsiella pneumoniae* and *Haemophilus influenzae*. 5  $\mu$ g of total protein of each lysate were loaded.
