# Supplementary material for: Polyvalent Bacterial Lysate Protects Against Pneumonia Independently of Neutrophils, IL-17A or Caspase-1 Activation
Source: PubMed Central journal article supplement (PMC8108696; doi:10.3389/fimmu.2021.562244), 2021-04-26
Supplement: Image_3.pdf [file Image_3.pdf]

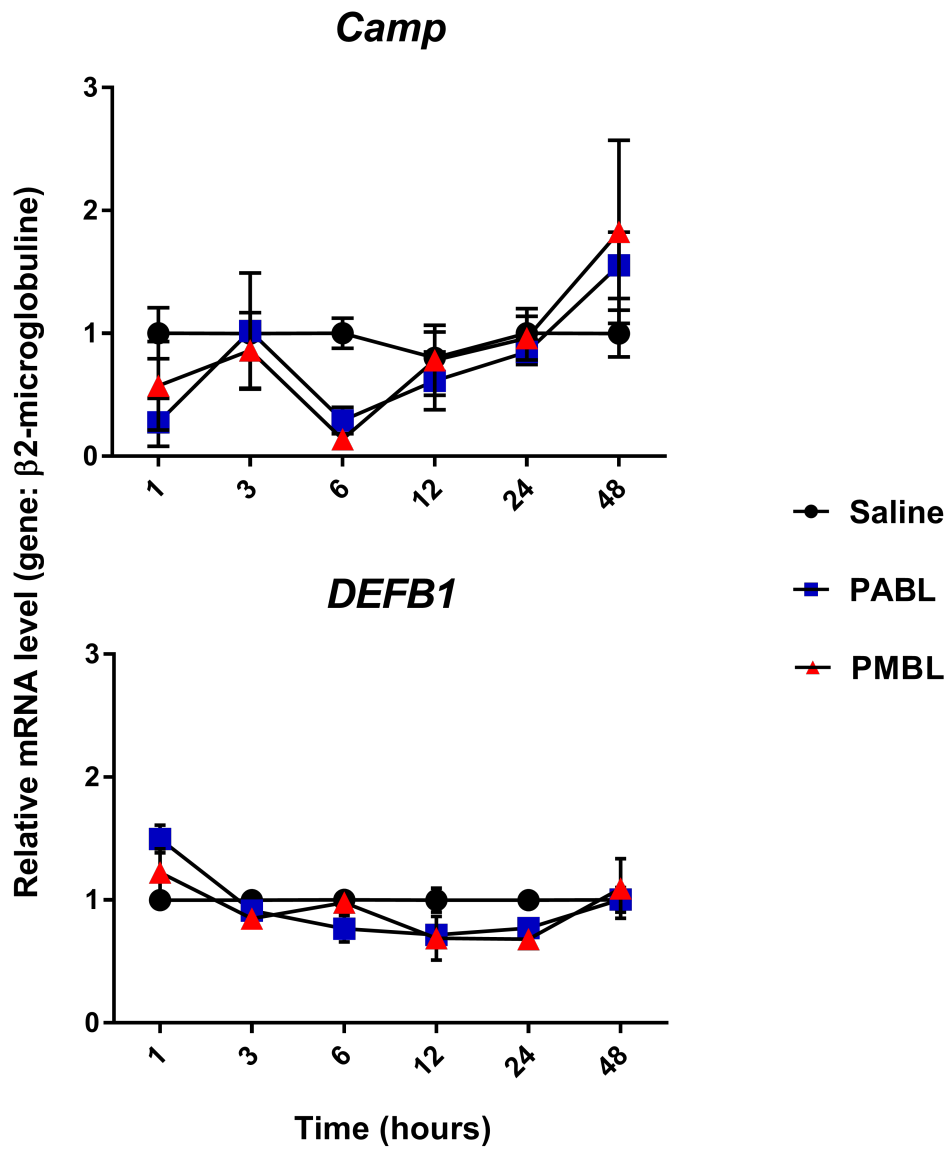

**Supplemental Figure 3.** Relative mRNA levels of *Camp*, and *DEFB1* as assessed by RT-qPCRs
